# Supplementary material
Source: PubMed Central journal article supplement (PMC4001403)
Supplement: supp_tpc.113.121905_tpc121905Supplemental.pdf [file supp_tpc.113.121905_tpc121905Supplemental.pdf]

AT1G25250

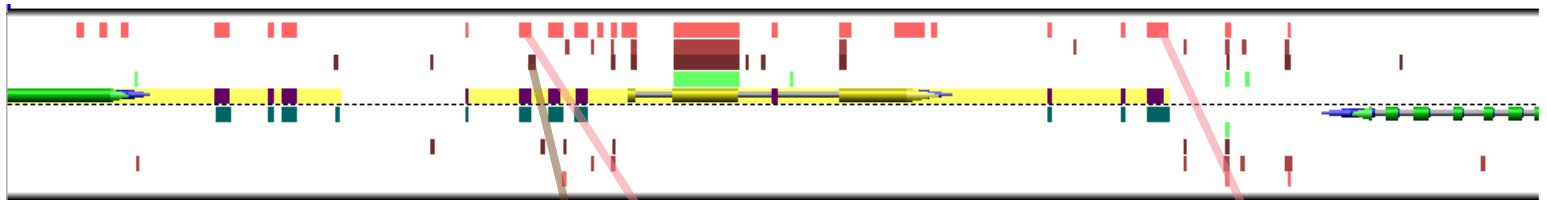

AT1G68130

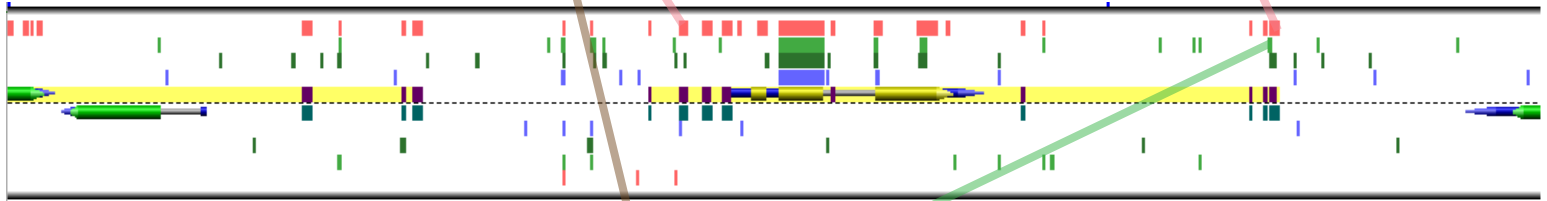

Columbine

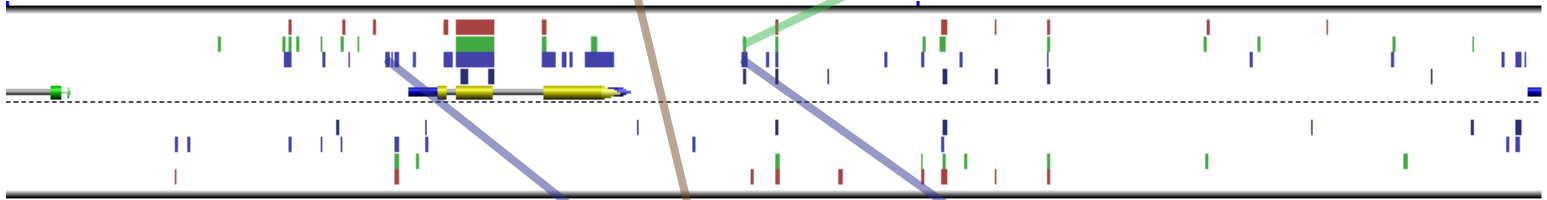

Grape

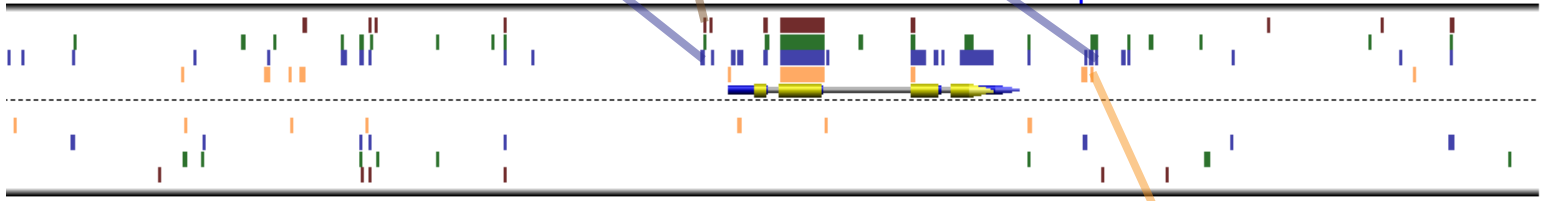

LOC\_Os08g36390

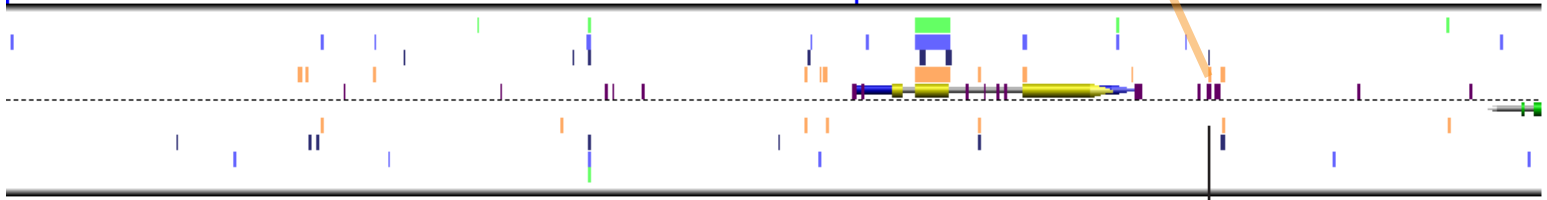<http://genomeevolution.org/r/98qs>

CNS592-3:

|                |                                                                                          |
|----------------|------------------------------------------------------------------------------------------|
| AT1G25250      | AACG <b>CATGAATTT</b> CAGTGCCAAAAAGATTGAAATGGTGGTTAGGAGTCAGGCTTCAGTCTCTCTCAC             |
| AT1G68130      | AAACG <b>CCATGGATTT</b> CAGTGCCAAA--GTTTGAAA---TGGTTAGGAGTCAGGCATCAGTCTCTCTCAC           |
| Columbine      | TAAATGCGTATAAAAA <b>CCATGGTTTT</b> CAGTGCCATG---ATTCTAA                                  |
| Grape          | TAAATGTTTATAAAAA <b>CCATGTTTT</b> CAGTGCCACA---GTTGAAA---TGGTTAAGA--CAGGCACTCGTCTCTCTCAA |
| LOC_Os08g36390 | <b>CATGGTTTT</b> CAGTGCCACA--G                                                           |

**Supplemental Figure 1. Use of GEvo panels to detect deeply conserved CNSs.** This panel (<http://genomeevolution.org/r/98qs>) shows two deep CNSs detected between orthologous *Arabidopsis* and columbine zinc finger, C2H2-type transcription factors. Orthologous genes are shown in yellow, with 5'- and 3'-UTR regions colored blue. Dark green rectangles below and purple rectangles adjacent to the *Arabidopsis* gene structure depict pre-annotated  $\alpha$ -CNSs (Thomas et al., 2007; Turco et al., 2013). Colored rectangles above the gene structure represent blastn high scoring segment pairs (HSPs) between genomic regions, with HSPs in each panel organized from top to bottom as blastn hits to the corresponding panels. Regions shaded in yellow delineate the gene space, the CNS-associated region surrounding each *Arabidopsis* homologous gene pair. Only two of the  $\alpha$ -CNSs shown in this figure are conserved in other eudicots. 592-1, the 5' proximal CNS, is conserved in all dicots examined including columbine. Although no direct blastn hit can be seen between *Arabidopsis* and columbine, HSPs between *Arabidopsis* and grape are visually connected to HSPs between grape and columbine. The second CNS, 592-3, is also conserved in rice and illustrates that not all CNSs are located 5' to their associated gene. The sequences retrieved for the 3' CNS from overlapping HSPs are shown below. The deep CNS sequence is in blue, which is the aligned region that is conserved between columbine and *Arabidopsis*. In this example, 15 out of 17 deep CNS positions are conserved.

A

## c-MYB transcriptional repressor of G2/M phase genes

AT3G09370 ACGAGTGC**CCGTT**TGAGGTTCAAACCTTCTGT  
 Columbine AAGAGTGC**CCGTT**TGA-GTTCAAACCTTTGT  
 Cacao TAGAGTGC**CCGTT**TGAGGTTCAAACCTTTGCC  
 Peach TAGAGTGC**CCGTT**TGAGGTTCAAACCTTTGT  
 Grape AAGAGTGC**CCGTT**TGAGGTTCAAACCTTTGCC  
 AT5G02320 AAGAGTGC**CCGTT**TGAGGTTGAAACCTTTATT

AT3G09370 GTTC**AACGGG**CAAAGTATTTTT-CGAA  
 Columbine CTTC**AACGGG**CGAGGTTTTTT---GAA  
 Cacao TTTC**AACGGG**CGAGGATTTTT--CGAA  
 Peach TTTC**AACGGG**CGAGGATTTTT--CGAA  
 Grape ATTC**AACGGG**CGAGGTTTTTT--CGAA  
 AT5G02320 GTTC**AACGGG**CAAAGTTTTTTTT-CGAA  
 AT2G13960 GTTC**AACGGG**CAAAGTTTTTTTT-CGAA  
 LOC\_Os01g62410 CTTC**AACGGG**CGAGGTTTTTT---GAA  
 Sb03g039470 CTTC**AACGGG**CGAGGTTTTTT---GAA  
 Banana CTTC**AACGGG**CGAGGTTTCTTTTCGAA  
 Banana CTTC**AACGGG**CGAGGTTTCTTTTCGAA

## protein amino acid N-linked glycosylation

Banana C**AAACGGC**TATAATT  
 LOC\_Os02g38140 C**AAACGGC**TATAATT  
 AT5G14480 C**AAACGGC**TATAATT  
 Banana A**GAACGGC**TATTATA  
 LOC\_Os04g40150 C**GAACGGC**TATAATT  
 Cacao C**AAACGGC**TATTATT  
 AT3G01620 C**AAACGGC**TATAATT  
 Peach C**AAACGGC**TATAATT  
 Grape C**AAACGGC**TATAATT  
 Columbine C**AAACGGC**TATAATT  
 Sorghum C**AAACGGC**TATAATT  
 Sorghum C**AAACGGC**TATAATT

## glycosyl hydrolase

Peach TTCGGCTG-AGA**CCGTT**GATTGCGGTTGGGAATAAAG  
 Cacao TTCGGCGG-AGA**CCGTT**GATTGCGGTTGGGAATAAAG  
 AT1G64390 TTCGGCGGAGG**CCGTT**GATTGCGGTTGGGAATAAAG  
 Columbine TTCAGCTGTTT**CCGTT**GATTACGGTTGGGAATAAAA  
 Grape TTCGGCGG-AGG**CCGTT**GATTGCGGTTGGGAATAAAG

## cyclin-dependent protein kinase

Peach ATCC**AACGG**TCAGATTTC**A**-----CTAG**CCGTT**GTATTTGAAAA  
 Cacao ATCC**AACGG**TCACTTT**T**ACGAG-----CTAG**CCGTT**GTATTTGAAAA  
 Grape ATCC**AACGG**CTGGAATTC**A**-----CTAG**CCGTT**GGTTTTAAAAA  
 AT1G20610 ATCC**AACGG**CTGAGATG**A**-----CTAG**CCGTT**TAATTTTAAAGA  
 Columbine ATCC**AACGG**CCACTATTC**A**-----CTAG**CCGTT**AGTTTTTAAAAA  
 AT1G76310 ATCC**AACGG**TTAAGAT**T**A-----CTAG**CCGTT**GTATTTTAAAAA  
 AT4G35620 ATCC**AACGG**TCATCT**T**AATCAC-----CTAG**CCGTT**GTATTTTCCCTT  
 AT2G17620 ATCC**AACGG**TTATAT**T**CTAATTTCTAAT**C**CTAG**CCGTT**CTTTTTTAA  
 ColumbineMule ATCC**AACGG**CTGACAAAA**A**-----CTAG**CCGTT**A

## RING finger-like zinc finger SHI family transcription factor

AT1G19790 GAAGCTACTTTTT-CC**AGTTT**A**T**CC**GT**TTGCTTGCCGGATCT**AAA**  
 AT1G75520 CAAGCTACCTTTTTTCC**CGTT**T**A**CC**GT**TTGCTTGCCGGATCT**AAA**  
 Grape GAAGCTGCTTTTTTTCC**CGTT**T**C**CC**GT**TTACTTGCCGGATG**AAA**  
 Peach GAAGCCGCTTTTT--CC**GT**TT**A**CC**GT**TTCTCTTGCCGGATG**AAA**  
 Cacao GAAGCCGCTTTTT--CC**ATTT**A**C**CC**GT**TTGCTTGCCGGATG**AAA**  
 Columbine GAAGTCCTTTTTT-CC**TGTT**A**C**CC**GT**TTGTTTGCCGGTTG**AAA**

## cytochrome p450 - brassinolide metabolism

Cacao TTCCAAT**GGCGG**CCCTACGCCGTAGGCCTTG  
 AT2G26710 CTCCAAT**GGCGG**CCCTACGCCGTGGCCTTG  
 Grape TACCAAT**GGCGG**CCCTACGCCGTGGCCTTG  
 Peach TTCCAAG**GGCGG**CCCTACGCCGTGGCCTTG  
 Columbine TTCCAAT**GGCGG**CCCTACG

## RING finger SHI family transcription factor

AT5G553590 TGAT**GGCGG**C**T**-TTGCAGAG  
 Rice TCAT**GGCGG**C**T**TTGCAGGC  
 Cacao TCAT**GGCGG**C**T**-TTGCAGGG  
 AT3G51060 TCAT**GGCGG**C**T**-TTGCAGAG  
 Peach GCAT**GGCGG**C**T**-TAGCAGAG  
 Banana CCAT**GGCGG**C**T**-TTACAGTG  
 Grape CCAT**GGCGG**C**T**-TTGCAGAG  
 Peach CCAT**GGCGG**C**T**-TTGCAGGG  
 Grape CCAT**GGCGG**C**T**-TTGCAGAG  
 Columbine CCAT**GGCGG**C**T**-TTGCAGAG  
 Banana CCAT**GGCGG**C**T**-TTGCAGCA  
 Banana CCAT**GGCGG**C**T**-TTGCAGTG  
 AT1G75520 CCAT**GGCGG**C**T**TTGCAGTT  
 Columbine CCAT**GGCGG**C**T**TTGCAGAG  
 AT4G36260 CCAT**GGCGG**C**T**-TTGCAGAA  
 Banana CCAT**GGCGG**C**T**-TTGCAGCA  
 Banana CCAT**GGCGG**C**T**-TTGCAGCA

## HLS1, apical hook development regulator

AT2G23060 GAGAA**CCATA**-AG**CCGCC**ATTTCC  
 Columbine GCGCAGCCATG--**GCCGCC**ATTTTT  
 AT4G37580 ACGCAGACATA--**GCCGCC**ATTTTC  
 Peach GCGCAGACACACA**GCCGCC**ATTTCC  
 Cacao GCGCAGCCATA--**GCCGCC**ATTTCC  
 Grape GCGCAGCCACA--**GCCGCC**ATTTCT  
 Banana GCGCAGCCACA--**GCCGCC**ATTTCC  
 Banana GCGCAGTCACA--**GCCGCC**ATTTCT  
 Banana GCGCAGCCACA--**GCCGCC**ATTTCT  
 Rice GCGCAGCCAAA--**GCCGCC**CTCTC  
 Columbine GCGCAGCCAAA--**GCCGCC**ATTTTC  
 Amborella GCGCAGCCACA--**GCCGCC**ATTTTC

**Supplemental Figure 2. Motifs over-represented in deep CNSs are phylogenetically conserved.**

**A. MSA box (AACGG).** B. GCC box (GGCGGC). CNS sequences are associated with the following genes. MSA box - C-MYB transcriptional repressor of G2/M phase genes: AT3G09370, AcoGoldSmith\_v1.006219m, Tc05\_g004560, PAC:17659278, GSVIVG01034171001, AT5G02320, AT2G13960, LOC\_Os01g62410, Sb03g039470, GSMUA\_Achr7G10520\_001, GSMUA\_Achr10G26610\_001; protein amino acid N-linked glycosylation: GSMUA\_Achr8G28540\_001, LOC\_Os02g38140, AT5G14480, GSMUA\_Achr10G16790\_001, LOC\_Os04g40150, Tc04\_g001940, AT3G01620, PAC:17662084, GSVIVG01032386001, AcoGoldSmith\_v1.006484m, Sb04g024790, Sb06g020110; glycosyl hydrolase: PAC\_17645685, Tc03\_g028870, AT1G64390, AcoGoldSmith\_v1.002101m, GSVIVG01019523001; cyclin-dependent protein kinase: PAC:17653262, Tc01\_g000600, GSVIVG01009895001, AT1G20610, AcoGoldSmith\_v1.005274m, AT1G76310, AT4G35620, AT2G17620, columbine Mule; RING finger-like zinc finger SHI family transcription factor: AT1G19790, AT1G75520, GSVIVG01009812001, PAC:17653900, Tc08\_g002910, AcoGoldSmith\_v1.008533m. GCC-box - cytochrome p450: Tc09\_g010780, AT2G26710, GSVIVG01015485001, PAC:17643034, AcoGoldSmith\_v1.003329m; SHI family transcription factor: AT5G66350, LOC\_Os06g49830, Tc08\_g002910, AT3G51060, PAC:17656898, GSMUA\_Achr5G14410\_001, GSVIVG01018845001, PAC:17653900, GSVIVG01009812001, AcoGoldSmith\_v1.008533m, GSMUA\_Achr3G12550\_001, GSMUA\_Achr2G12310\_001, AT1G75520, AcoGoldSmith\_v1.023667m, AT4G36260, GSMUA\_Achr7G05730\_001, GSMUA\_Achr1G18650\_001; HLS1: AT2G23060, AcoGoldSmith\_v1.023967m, AT4G37580, PAC:17669007, Tc01\_g006370, GSVIVG01000131001, GSMUA\_Achr5G01700\_001, GSMUA\_Achr10G11370\_001, GSMUA\_Achr4G23250\_001, LOC\_Os07g02540, AcoGoldSmith\_v1.006140m, evm.TU.AmTr\_v1.0\_scaffold00137.5.

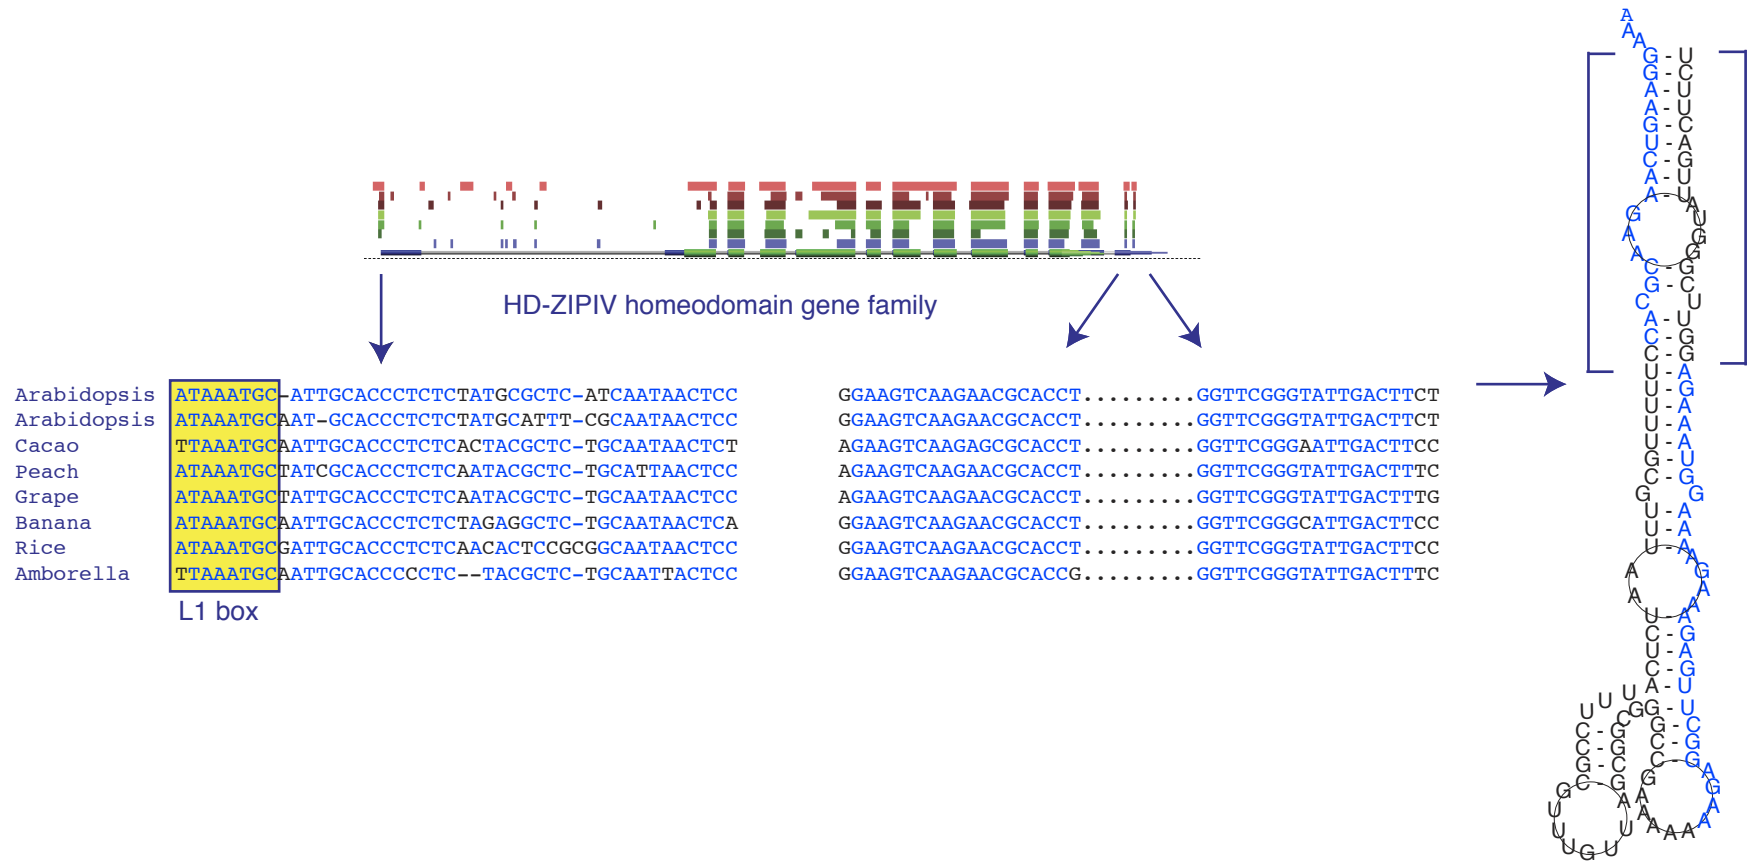

**Supplemental Fig 3. ATML1 and PDF2 have a 5' proximal experimentally-validated L1 box (Abe et al. 2001; Abe et al. 2003; Takada and Jurgens 2007) and a 3' UTR CNS with a potential RNA-fold.** GEvo panel showing blastn hits (colored rectangles) between *Arabidopsis* PDF2 and (from top to bottom) orthologous genes from *Arabidopsis* (*ATML1*), cacao, peach, grape, banana, rice, and amborella (<http://genomeevolution.org/r/97su>). The sequences of the three deep CNSs associated with this gene family are shown below the corresponding blastn hits. Nucleotides conserved in at least 6 of the 8 sequences are colored blue. The 5' proximal CNS has an experimentally-verified epidermis-specific transcription factor binding site, the L1 box, which is boxed in yellow. The two CNSs present in the 3' UTR have the potential to form RNA secondary structure. The RNAfold-predicted optimal secondary structure for *ATML1*, with a minimal free energy of -42.90 kcal/mol, is shown to the right of the sequences, with bases colored blue corresponding to dsRNA reads. The bracketed region is deeply conserved throughout angiosperms and includes nucleotides present in looped-out regions. HD-ZIP IV homeodomain genes: *Arabidopsis* AT4G04890 (PDF2, *Arabidopsis* AT4G21750 (*ATML1*), cacao Tc02\_g17643801, peach PAC:17643801, grape GSVIVG01012643001, banana GSMUA\_Achr8G07310\_001, rice LOC\_Os04g53540 and amborella evm.TU.AmTr\_v1.0\_scaffold00004.843.

**Supplemental Table 1.** Genes associated with deep CNS sequences described in Figure 3.

|                   |                                                                                                                                                                                                                                                                                                                                                            |
|-------------------|------------------------------------------------------------------------------------------------------------------------------------------------------------------------------------------------------------------------------------------------------------------------------------------------------------------------------------------------------------|
| NGA1-4            | AcoGoldSmith_v1.017991m, AT2G46870, AT3G61970, PAC:17653345, Tc03_g022470, GSMUA_Achr1G03600_001, GSMUA_Achr4G24970_001, GSMUA_Achr2G10230_001, LOC_Os03g02900, Sb01g049150, GSVIVG01027463001, GSMUA_Achr4G30170_001, LOC_Os04g49230, Sb06g026370, LOC_Os02g45850, PAC:17648747, Tc00_g048490, AT1G01030 and AT4G01500, evm.TU.amTr_v1.0_scaffold00018.22 |
| PAR2              | AcoGoldSmith_v1.016845m, grape, PAC_17664766, Tc01_g014560, AT3G58850                                                                                                                                                                                                                                                                                      |
| polygalacturonase | AT1G60590, AcoGoldSmith_v1.002735m, AT1G10640, Tc02_g023950, PAC:17665277, GSVIVG01013772001, AcoGoldSmith_v1.003611m                                                                                                                                                                                                                                      |
| bZIP              | GSMUA_Achr3G31390_001, GSMUA_Achr3G03550_001, GSMUA_Achr7G25310_001, LOC_Os01g11350, Sb03g002050, LOC_Os02g14910, Sb04g008840, GSVIVG01020658001, AcoGoldSmith_v1.026203m, AT3G58120, PAC:17652691, Tc00_g087150                                                                                                                                           |
| AT-hook motif     | AcoGoldSmith_v1.009502m, PAC:scaffold_1_4872201_4872989, GSVIVG01036210001, AT4G14465, Tc04_g025020                                                                                                                                                                                                                                                        |

**Supplemental Table 2.** Genes associated with deep CNS sequences used to derive the RNAz-predicted consensus RNA structures depicted in Figure 4.

|                           |                    |                                  |
|---------------------------|--------------------|----------------------------------|
| (B) bHLH                  | <i>Arabidopsis</i> | AT4G29100                        |
|                           | peach              | PAC:17643560                     |
|                           | grape              | GSVIVG01015353001                |
|                           | columbine          | AcoGoldSmith_v1.007621m          |
|                           | banana             | GSMUA_Achr2G15350                |
|                           | <i>Amborella</i>   | evm.TU.AmTr_v1.0_scaffold00109.1 |
| (C) DEAD box RNA helicase | <i>Arabidopsis</i> | AT3G01540, AT5G14610             |
|                           | rice               | LOC_Os01g36860                   |
|                           | banana             | GSMUA_Achr8G31890                |
|                           | <i>Amborella</i>   | evm.TU.AmTr_v1.0_scaffold00096.5 |

**Supplemental Table 3.** CNSs with predicted RNA-folds

| <i>Arabidopsis</i><br>genes  | Rice<br>genes               | Gene<br>description           | Position | dsRNA<br>reads<br>present <sup>a</sup> |
|------------------------------|-----------------------------|-------------------------------|----------|----------------------------------------|
| <b>AT4G04890</b>             | LOC_Os04g53540              |                               |          |                                        |
| <b>AT4G21750<sup>b</sup></b> | LOC_Os08g08820 <sup>c</sup> | HD-ZIPIV transcription factor | 3' UTR   | Yes                                    |
| <b>AT2G20100</b>             |                             |                               |          |                                        |
| <b>AT4G29100</b>             | LOC_Os02g17680              | bHLH                          | 3' UTR   | Yes                                    |
| <b>AT2G29630</b>             | LOC_Os03g47610              | THIC                          | 3' UTR   | Yes                                    |
|                              | LOC_Os02g10700              |                               |          |                                        |
| <b>AT5G25350</b>             | LOC_Os06g40360              | F-box and LRR                 | 3' UTR   | Yes                                    |
| <b>AT3G09050</b>             |                             |                               |          |                                        |
| <b>AT5G01175</b>             | LOC_Os01g63410              | thylakoid membrane protein    | 3' UTR   | Yes                                    |
| <b>AT1G20880</b>             |                             | RNA recognition motif         |          |                                        |
| <b>AT1G76460</b>             |                             | (RRM)-containing protein      | 3' UTR   |                                        |
| <b>AT3G48390</b>             |                             |                               |          |                                        |
| <b>AT5G63190</b>             |                             | eIF-4 gamma                   | 5' UTR   | Yes                                    |
| <b>AT1G57680</b>             | LOC_Os01g66190              | G-protein coupled receptor 1  | 5' UTR   |                                        |
| <b>AT3G01540</b>             |                             |                               | 5' UTR/  |                                        |
| <b>AT5G14610</b>             | LOC_Os01g36860              | DEAD-box RNA helicase         | intron   | Yes                                    |
| <b>AT1G71692</b>             | LOC_Os08g02070              | MADS box/MIKCC type box       | 5' UTR   |                                        |
| <b>AT4G26850</b>             | LOC_Os12g08810              | VTC2, rate-limiting step in   |          |                                        |
| <b>AT5G55120</b>             | LOC_Os12g41800              | ascorbate biosynthesis        | 5' UTR   | Yes                                    |
|                              |                             | adenosylmethionine            |          |                                        |
| <b>AT5G18930</b>             |                             | decarboxylase                 | 5' UTR   |                                        |
| <b>AT4G27000</b>             | LOC_Os04g53440              |                               |          |                                        |
| <b>AT5G54900</b>             | LOC_Os08g09100              | RNA binding family protein    | intron   |                                        |
|                              |                             | pre-mRNA processing factor    |          |                                        |
| <b>AT1G04080</b>             | LOC_Os03g11200              | 39                            | intron   |                                        |

*Arabidopsis* and rice genes with conserved potential RNA-fold structures.

<sup>a</sup> Zheng et al., 2010

<sup>b</sup>Also AT1G17920, AT1G73360, AT4G17710, AT5G46880, AT1G05230, AT2G32370, AT4G00730, and AT3G61150

<sup>c</sup>Also LOC\_Os08g04190, LOC\_Os06g10600, LOC\_Os10g42490, LOC\_Os04g48070, LOC\_Os02g45250, and LOC\_Os09g35760

**Supplemental Table 4.** Experimentally-validated deep CNSs

| <b>Family</b>                                                               | <b>Locus ID</b>        | <b>Biological role</b>                                                              | <b>CNS role</b>                                                                                     | <b>Reference</b>                                                               |
|-----------------------------------------------------------------------------|------------------------|-------------------------------------------------------------------------------------|-----------------------------------------------------------------------------------------------------|--------------------------------------------------------------------------------|
| <b>ATML1/PDF2 HD<br/>ZIPIV<br/>homeodomain<br/>transcription<br/>factor</b> | AT4G04890<br>AT4G21750 | Regulating<br>epidermal cell<br>fate                                                | L1 box specifying<br>epidermal<br>expression                                                        | Abe et al.<br>(2001); Abe et<br>al. (2003);<br>Takada and<br>Jürgens<br>(2007) |
| <b>AGL15 MADS-<br/>domain<br/>transcription<br/>factor</b>                  | AT5G13790              | Regulating<br>embryogenesis                                                         | CARG3 box;<br>negative<br>autoregulation                                                            | Zhu and Perry<br>(2005)                                                        |
| <b>SHI/STY RING-<br/>like zinc finger<br/>transcription<br/>factors</b>     | AT3G51060<br>AT5G66350 | Transcriptional<br>activators of<br>auxin<br>biosynthetic<br>genes                  | GCC box required<br>for expression in<br>aerial tissues                                             | Eklund et al.<br>(2011)                                                        |
| <b>YABBY zinc<br/>finger<br/>transcription<br/>factors</b>                  | AT2G45190<br>AT4G00180 | Abaxial cell type<br>specification                                                  | cis-element<br>suppressing<br>adaxial expression                                                    | Watanabe and<br>Okada (2003)                                                   |
| <b>MIR165a/b</b>                                                            | AT1G01183<br>AT4G00885 | Xylem<br>specification,<br>floral stem<br>termination, leaf<br>polarity             | cis-element<br>suppressing<br>adaxial expression                                                    | Yao et al.<br>(2009)                                                           |
| <b>SPL transcription<br/>factors</b>                                        | AT1G53160<br>AT3G15270 | Mediate<br>flowering time<br>via activation of<br>floral meristem<br>identity genes | miRNA responsive<br>element subject to<br>translational<br>repression by<br>miR156                  | Gandikota et<br>al. (2007)                                                     |
| <b>MYB44/MYB77<br/>transcription<br/>factors</b>                            | AT3G50060<br>AT5G67300 | Induction of<br>stress genes                                                        | VRE box bound by<br>VIP1                                                                            | Pitzschke et<br>al. (2009)                                                     |
| <b>CUC2 NAC<br/>transcription<br/>factor</b>                                | AT5G53950              | Boundary<br>formation                                                               | Restricts<br>expression to<br>intercotyledonary<br>region                                           | Larsson et al.<br>(2012)                                                       |
| <b>BAS1</b>                                                                 | AT2G26710              | Steroid<br>hydroxylase<br>inactivating<br>brassinosteroid                           | LBD motif bound by<br>LOB                                                                           | Bell et al.<br>(2012)                                                          |
| <b>CESA4 cellulose<br/>synthase</b>                                         | AT5G44030              | Secondary wall<br>cellulose<br>synthesis                                            | cis-element for<br>MYB44                                                                            | Kim et al.<br>(2013a); Kim<br>et al. (2013b)                                   |
| <b>glyceraldehyde-<br/>3-phosphate<br/>dehydrogenase</b>                    | AT1G12900<br>AT3G26650 | Photosynthetic<br>carbon fixation                                                   | GATA box bound<br>by GATA-1                                                                         | Jeong and<br>Shih (2003)                                                       |
| <b>THIC</b>                                                                 | AT2G29630              | Thiamine<br>biosynthesis                                                            | Binds TPP aptamer<br>which prevents 3'<br>UTR intron splicing<br>thus lowering<br>transcript levels | Wachter et al.<br>(2007)                                                       |

### Supplemental References:

- Abe, M., Katsumata, H., Komeda, Y., and Takahashi, T. (2003). Regulation of shoot epidermal cell differentiation by a pair of homeodomain proteins in *Arabidopsis*. *Development* 130, 635-643.
- Bell, E.M., Lin, W.C., Husbands, A.Y., Yu, L., Jaganatha, V., Jablonska, B., Mangeon, A., Neff, M.M., Girke, T., and Springer, P.S. (2012). *Arabidopsis* lateral organ boundaries negatively regulates brassinosteroid accumulation to limit growth in organ boundaries. *Proc. Natl. Acad. Sci. USA* 109, 21146-21151.
- Hanada, K., Zhang, X., Borevitz, J.O., Li, W.H., and Shiu, S.H. (2007). A large number of novel coding small open reading frames in the intergenic regions of the *Arabidopsis thaliana* genome are transcribed and/or under purifying selection. *Genome Res.* 17, 632-640.
- Kim, W.-C., Kim, J.-Y., Ko, J.-H., Kim, J., and Han, K.-H. (2013a). Transcription factor MYB46 is an obligate component of the transcriptional regulatory complex for functional expression of secondary wall-associated cellulose synthases in *Arabidopsis thaliana*. *J. Plant Physiol.* 170, 1374-1378.
- Kim, W.C., Ko, J.H., Kim, J.Y., Kim, J.M., Bae, H.J., and Han, K.H. (2013b). MYB46 directly regulates the gene expression of secondary wall-associated cellulose synthases in *Arabidopsis*. *Plant J.* 73, 26-36.
- Pérez-Rodríguez, P., Riaño-Pachón, D.M., Corrêa, L.G., Rensing, S.A., Kersten, B., and Mueller-Roeber, B. (2010). PlnTFDB: updated content and new features of the plant transcription factor database. *Nucleic Acids Res.* 38, D822-827.
- Pitzschke, A., Djamei, A., Teige, M., and Hirt, H. (2009). VIP1 response elements mediate mitogen-activated protein kinase 3-induced stress gene expression. *Proc. Natl. Acad. Sci. USA* 106, 18414-18419.
- Takada, S., and Jürgens, G. (2007). Transcriptional regulation of epidermal cell fate in the *Arabidopsis* embryo. *Development* 134, 1141-1150.
- Watanabe, K., and Okada, K. (2003). Two discrete cis elements control the Abaxial side-specific expression of the FILAMENTOUS FLOWER gene in *Arabidopsis*. *Plant Cell* 15, 2592-2602.
- Yao, X., Wang, H., Li, H., Yuan, Z., Li, F., Yang, L., and Huang, H. (2009). Two types of cis-acting elements control the abaxial epidermis-specific transcription of the MIR165a and MIR166a genes. *FEBS Lett.* 583, 3711-3717.
